# Supplementary material for: Differential Solvent DEEP-STD NMR and MD Simulations Enable the Determinants of the Molecular Recognition of Heparin Oligosaccharides by Antithrombin to Be Disentangled
Source: MDPI journal article supplement (doi:10.3390/ijms25094669), 2024-04-25
Supplement: s1 [file s1]

# Differential solvent DEEP-STD NMR and MD simulations enable the determinants of the molecular recognition of heparin oligosaccharides by antithrombin to be disentangled

Michela Parafioriti <sup>1</sup>, Stefano Elli <sup>1</sup>, Juan C. Muñoz-García <sup>2</sup>, Jonathan Ramírez-Cárdenas <sup>2</sup>, Edwin A. Yates <sup>3,4</sup>, Jesús Angulo <sup>2,\*</sup> and Marco Guerrini <sup>1,\*</sup>

<sup>1</sup> Istituto di Ricerche Chimiche e Biochimiche "G. Ronzoni", Via Giuseppe Colombo 81, 20133, Milano, Italia

<sup>2</sup> Instituto de Investigaciones Químicas (IIQ)-Consejo Superior de Investigaciones Científicas (CSIC), Avenida Americo Vespucio 49, 41092, Sevilla, España

<sup>3</sup> Department of Biochemistry and Systems Biology, Institute of Systems, Molecular and Integrative Biology, University of Liverpool, L69 7ZB Liverpool, United Kingdom

<sup>4</sup> Centre for Glycoscience, Keele University, Newcastle-Under-Lyme, ST5 5BG Staffordshire, United Kingdom

\* Correspondence: J.A. [j.angulo@iiq.csic.es](mailto:j.angulo@iiq.csic.es); M.G. [guerrini@ronzoni.it](mailto:guerrini@ronzoni.it)

## Supporting Information

### Index

**Figure S1.** STD NMR analysis of pentasaccharide (1) in interaction with AT conducted in D<sub>2</sub>O buffer.

**Figure S2.** STD NMR analysis of pentasaccharide (1) in interaction with AT conducted in H<sub>2</sub>O buffer.

**Figure S3.** STD NMR analysis of pentasaccharide (2) in interaction with AT conducted in D<sub>2</sub>O buffer.

**Figure S4.** STD NMR analysis of pentasaccharide (2) in interaction with AT conducted in H<sub>2</sub>O buffer.

**Table S1.** Absolute and relative STD percentages (STD %) of selected protons of pentasaccharide (1).

**Table S2.** Absolute and relative STD percentages (STD %) of selected protons of pentasaccharide (2).

**Table S3.** DEEP-STD NMR analysis using different solvents (D<sub>2</sub>O/H<sub>2</sub>O) of the pentasaccharide (1)-AT and pentasaccharide (2)-AT complexes.

**Table S4.** <sup>3</sup>J<sub>H-H</sub> coupling constants (Hz) of the sugar units of pentasaccharide (1) in the unbound state.

**Table S5.** <sup>3</sup>J<sub>H-H</sub> coupling constants (Hz) of the sugar units of pentasaccharide (2) in the unbound state.

**Figure S5.** NOESY spectrum of pentasaccharide (1) [panel (a)]. Tr-NOESY spectrum of pentasaccharide (1) interacting with AT [panel (b)].

**Figure S6.** NOESY spectrum of pentasaccharide (2) [panel (a)]. Tr-NOESY spectrum of pentasaccharide (2) interacting with AT [panel (b)].

**Table S6.** H1-H2 NOEs and tr-NOEs of GlcNS6S(E, C, A) of pentasaccharide (1) in the unbound and AT-bound states.

**Table S7.** H1-H2 NOEs and tr-NOEs of GlcNS6S(E, C, A) of pentasaccharide (2) in the unbound and AT-bound states.

**Table S8.** H5-H2 and H5-H4 NOEs and tr-NOEs of IdoA(B) of pentasaccharide (2) in the unbound and AT-bound states.

**Table S9.** H1-H6 and H1-H4 interglycosidic NOEs and tr-NOEs characterizing the backbone conformation of pentasaccharide (1) in the unbound and AT-bound states.

**Table S10.** H1-H6 (or H1-H3) and H1-H4 interglycosidic NOEs and tr-NOEs characterizing the backbone conformation of pentasaccharide (2) in the unbound and AT-bound states.

**Figure S7.** RMSD analysis of pentasaccharides (1) and (2) in complex with AT.

**Figure S8.** RMSF analysis of the ligand units and key protein residues in the pentasaccharide (1)-AT and pentasaccharide (2)-AT complexes.

**Figure S9.** Conformation of IdoA2S(B) and IdoA(B).

**Figure S10.** Structures of pentasaccharides (1) and (2) in the AT-bound state selected from the MD trajectories considering the most populated state for each dihedral angle.

**Figure S11.** Conformers of pentasaccharides (1) and (2) in the AT-bound state obtained by clustering analysis.

**Table S11.** Dihedral angles ( $\varphi_i/\psi_i$ ) of the clustered conformers of pentasaccharides (1) and (2) in the AT-bound state.

**Figure S12.** Distances (Å) of GlcNS6S(E)(6S) to K125 and R129 versus MD simulation time (ns) in the pentasaccharide (1)-AT and pentasaccharide (2)-AT complexes.

**Figure S13.** Distance (Å) between GlcA(D)(COO<sup>-</sup>) and K125 versus MD simulation time (ns) in the pentasaccharide (1)-AT and pentasaccharide (2)-AT complexes.

**Figure S14.** Distances (Å) of GlcNS3S6S(C)(NS) to R13 and K114, GlcNS3S6S(C)(3S) to K114, GlcNS3S6S(C)(6S) to R46 versus MD simulation time (ns) in the pentasaccharide (1)-AT and pentasaccharide (2)-AT complexes.

**Figure S15.** Distances (Å) of IdoA2S(2S)/IdoA(B)(2OH) to R13, IdoA2S/IdoA(B)(COO<sup>-</sup>) to R46, R47 and K114 versus MD simulation time (ns) in the pentasaccharide (1)-AT and pentasaccharide (2)-AT complexes.

**Figure S16.** Distances (Å) of GlcNS6S(A)(NS) to R46 and R47, GlcNS6S(A)(6S) to R13 and K114 versus MD simulation time (ns) in the pentasaccharide (1)-AT and pentasaccharide (2)-AT complexes.

**Figure S17.** Radial distribution function [g(r)] curves between selected protein residues and water molecules in the pentasaccharide (1)-AT and pentasaccharide (2)-AT complexes.

**Figure S18.** Radial distribution function [g(r)] curves between ligand units and water molecules in the pentasaccharide (1)-AT and pentasaccharide (2)-AT complexes.

**Figure S19.** Radial distribution function [g(r)] curves between selected ligand protons and water molecules in the pentasaccharide (1)-AT and pentasaccharide (2)-AT complexes.

**Table S12.** Comparison between the binding epitopes obtained experimentally (Exp STD) and calculated during MD simulation (Sim STD) of pentasaccharide (1) in complex with AT.

**Table S13.** Comparison between the binding epitopes obtained experimentally (Exp STD) and calculated during MD simulation (Sim STD) of pentasaccharide (2) in complex with AT.

**Figure S20.** Evolution of the R-factor (R-NOE) of pentasaccharide (1) over the last 500 ns of MD simulation.

**Figure S21.** Evolution of the R-factor (R-NOE) of pentasaccharide (2) over the last 500 ns of MD simulation.

**Table S14.**  $^1\text{H}/^{13}\text{C}$  chemical shift assignment of pentasaccharide (1).

**Table S15.**  $^1\text{H}/^{13}\text{C}$  chemical shift assignment of pentasaccharide (2).

**Figure S22.**  $^1\text{H}$ - $^{13}\text{C}$  HSQC NMR spectrum of pentasaccharide (1).

**Figure S23.**  $^1\text{H}$ - $^{13}\text{C}$  HSQC NMR spectrum of pentasaccharide (2).

**Figure S24.** Conformations of the  $\varphi_i/\psi_i$  dihedral angles of pentasaccharide (1) in complex with AT.

**Figure S25.** Conformations of the  $\varphi_i/\psi_i$  dihedral angles of pentasaccharide (2) in complex with AT.

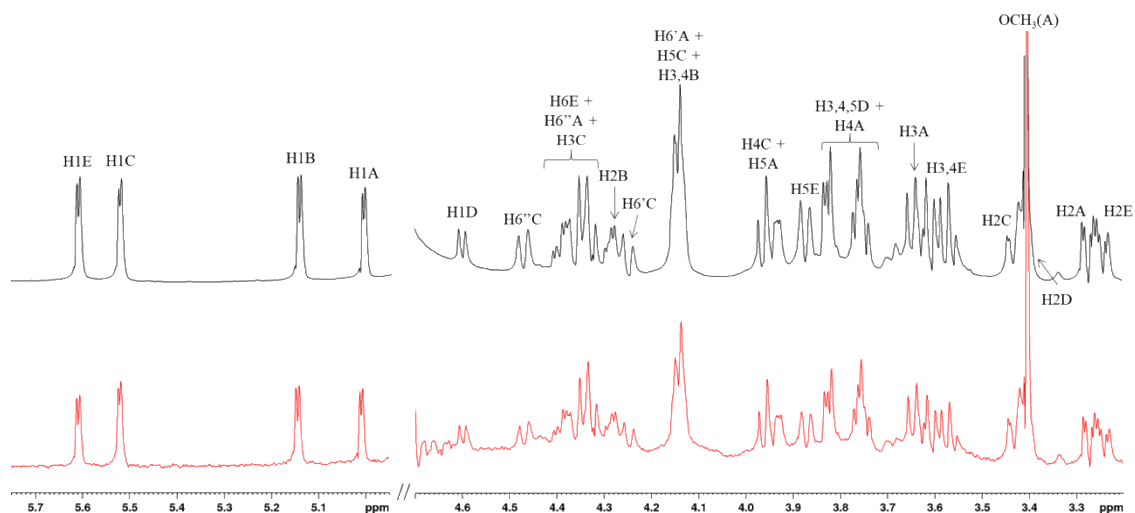

**Figure S1.** STD NMR analysis of pentasaccharide (1) in interaction with AT conducted in D<sub>2</sub>O buffer. Superimposition of the STD NMR spectrum (red line) and the reference spectrum (black line) of the pentasaccharide (1)-AT mixture in D<sub>2</sub>O.

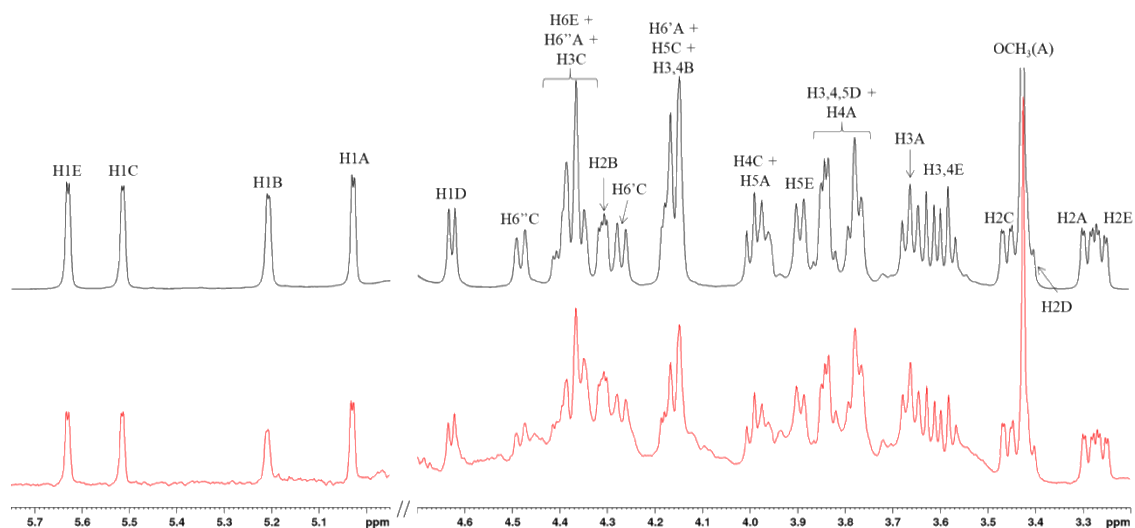

**Figure S2.** STD NMR analysis of pentasaccharide (1) in interaction with AT conducted in H<sub>2</sub>O buffer. Superimposition of the STD NMR spectrum (red line) and the reference spectrum (black line) of the pentasaccharide (1)-AT mixture in H<sub>2</sub>O.

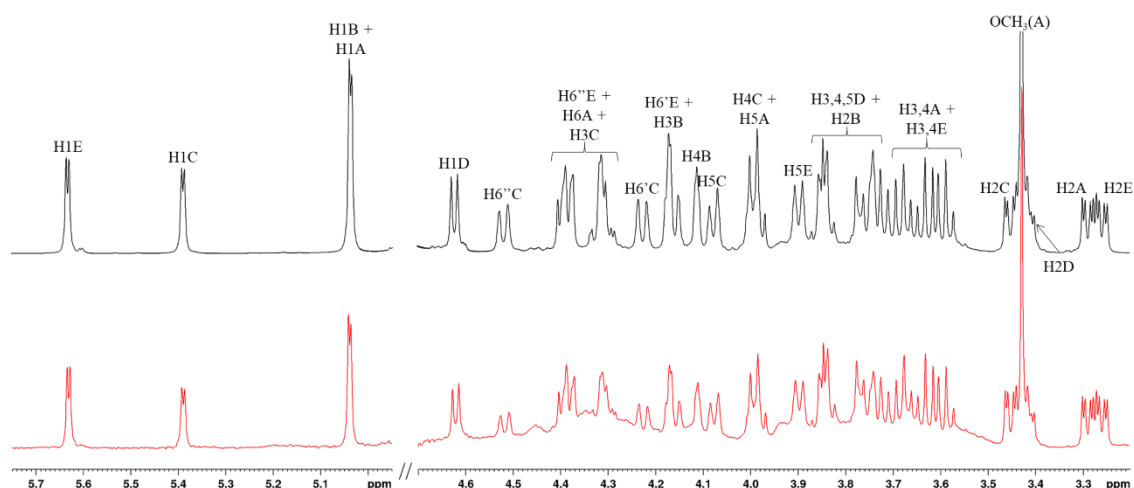

**Figure S3.** STD NMR analysis of pentasaccharide (2) in interaction with AT conducted in D<sub>2</sub>O buffer. Superimposition of the STD NMR spectrum (red line) and the reference spectrum (black line) of the pentasaccharide (2)-AT mixture in D<sub>2</sub>O.

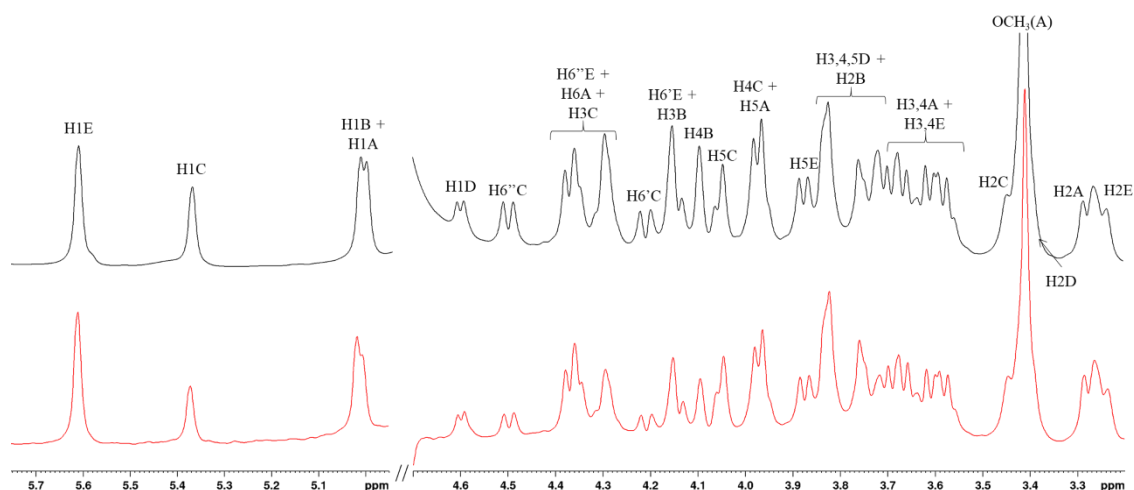

**Figure S4.** STD NMR analysis of pentasaccharide (2) in interaction with AT conducted in H<sub>2</sub>O buffer. Superimposition of the STD NMR spectrum (red line) and the reference spectrum (black line) of the pentasaccharide (2)-AT mixture in H<sub>2</sub>O.

**Table S1.** Absolute and relative STD percentages (STD %) of selected protons of pentasaccharide (1).

| Proton               | <i>Pentasaccharide (1)-AT</i> |                  |                  |                  |
|----------------------|-------------------------------|------------------|------------------|------------------|
|                      | Absolute STD %                |                  | Relative STD %   |                  |
|                      | D <sub>2</sub> O              | H <sub>2</sub> O | D <sub>2</sub> O | H <sub>2</sub> O |
| H1E                  | 1.04                          | 1.46             | 70               | 69               |
| H2E                  | 1.16                          | 1.52             | 78               | 72               |
| H5E                  | 1.03                          | 1.27             | 69               | 60               |
| H1D                  | 1.07                          | 1.29             | 72               | 61               |
| H1C                  | 1.04                          | 1.49             | 70               | 70               |
| H2C                  | 1.49                          | 2.11             | 100              | 100              |
| H6''C                | 1.22                          | 1.58             | 82               | 75               |
| H1B                  | 0.95                          | 1.37             | 64               | 65               |
| H2B                  | 1.21                          | 1.42             | 81               | 67               |
| H1A                  | 0.98                          | 1.38             | 66               | 66               |
| H2A                  | 1.42                          | 1.65             | 95               | 78               |
| H3A                  | 1.31                          | 1.57             | 88               | 74               |
| OCH <sub>3</sub> (A) | 1.22                          | 1.63             | 82               | 77               |
|                      | <i>Sum</i>                    | <i>Sum</i>       |                  |                  |
|                      | 15.16                         | 19.73            |                  |                  |

**Table S2.** Absolute and relative STD percentages (STD %) of selected protons of pentasaccharide (2).

| Proton               | <i>Pentasaccharide (2)-AT</i> |                  |                  |                  |
|----------------------|-------------------------------|------------------|------------------|------------------|
|                      | Absolute STD %                |                  | Relative STD %   |                  |
|                      | D <sub>2</sub> O              | H <sub>2</sub> O | D <sub>2</sub> O | H <sub>2</sub> O |
| H1E                  | 2.01                          | 2.10             | 76               | 90               |
| H2E                  | 2.14                          | 1.59             | 81               | 68               |
| H5E                  | 1.93                          | 1.59             | 73               | 68               |
| H1D                  | 1.89                          | 1.27             | 72               | 54               |
| H1C                  | 1.72                          | 1.35             | 65               | 58               |
| H2C                  | 2.44                          | 2.15             | 93               | 92               |
| H6''C                | 1.74                          | 1.32             | 66               | 57               |
| H4B                  | 1.45                          | 1.00             | 55               | 43               |
| H2A                  | 2.63                          | 2.34             | 100              | 100              |
| OCH <sub>3</sub> (A) | 1.56                          | 1.22             | 59               | 52               |
|                      | <i>Sum</i>                    | <i>Sum</i>       |                  |                  |
|                      | 19.50                         | 15.94            |                  |                  |

**Table S3.** DEEP-STD NMR analysis using different solvents (D<sub>2</sub>O/H<sub>2</sub>O) of the pentasaccharide (1)-AT and pentasaccharide (2)-AT complexes.

| Proton               | Pentasaccharide (1)-AT    |                           |                                                   |       | Pentasaccharide (2)-AT    |                           |                                                   |       |
|----------------------|---------------------------|---------------------------|---------------------------------------------------|-------|---------------------------|---------------------------|---------------------------------------------------|-------|
|                      | STD %<br>D <sub>2</sub> O | STD %<br>H <sub>2</sub> O | STD<br>D <sub>2</sub> O/H <sub>2</sub> O<br>Ratio | ΔSTD  | STD %<br>D <sub>2</sub> O | STD %<br>H <sub>2</sub> O | STD<br>D <sub>2</sub> O/H <sub>2</sub> O<br>Ratio | ΔSTD  |
| H1E                  | 1.04                      | 1.46                      | 0.71                                              | −0.05 | 2.01                      | 2.10                      | 0.96                                              | −0.28 |
| H2E                  | 1.16                      | 1.52                      | 0.76                                              | 0.00  | 2.14                      | 1.59                      | 1.34                                              | 0.11  |
| H5E                  | 1.03                      | 1.27                      | 0.82                                              | 0.05  | 1.93                      | 1.59                      | 1.21                                              | −0.02 |
| H1D                  | 1.07                      | 1.29                      | 0.83                                              | 0.06  | 1.89                      | 1.27                      | 1.48                                              | 0.25  |
| H1C                  | 1.04                      | 1.49                      | 0.70                                              | −0.07 | 1.72                      | 1.35                      | 1.28                                              | 0.04  |
| H2C                  | 1.49                      | 2.11                      | 0.71                                              | −0.06 | 2.44                      | 2.15                      | 1.14                                              | −0.10 |
| H6''C                | 1.22                      | 1.58                      | 0.78                                              | 0.01  | 1.74                      | 1.32                      | 1.31                                              | 0.08  |
| H2A                  | 1.42                      | 1.65                      | 0.86                                              | 0.09  | 2.63                      | 2.34                      | 1.12                                              | −0.11 |
| OCH <sub>3</sub> (A) | 1.22                      | 1.63                      | 0.75                                              | −0.02 | 1.56                      | 1.22                      | 1.28                                              | 0.04  |
|                      | Sum                       | Sum                       | Average                                           |       | Sum                       | Sum                       | Average                                           |       |
|                      | 10.71                     | 13.99                     | 0.77                                              |       | 18.05                     | 14.94                     | 1.24                                              |       |
|                      | St. Dev.                  |                           |                                                   |       | St. Dev.                  |                           |                                                   |       |
|                      | 0.06                      |                           |                                                   |       | 0.15                      |                           |                                                   |       |

**Table S4.** <sup>3</sup>J<sub>H-H</sub> coupling constants (Hz) of the sugar units of pentasaccharide (1) in the unbound state.

| <sup>3</sup> J <sub>H-H</sub> | GlcNS6S(E) | GlcA(D) | GlcNS3S6S(C) | IdoA2S(B) | GlcNS6S(A) |
|-------------------------------|------------|---------|--------------|-----------|------------|
| <sup>3</sup> J <sub>1-2</sub> | 3.7        | 7.9     | 3.5          | 3.7       | 3.6        |
| <sup>3</sup> J <sub>2-3</sub> | 10.0       | 9.9     | 10.7         | 7.3       | 10.5       |
| <sup>3</sup> J <sub>3-4</sub> | -          | -       | -            | -         | -          |
| <sup>3</sup> J <sub>4-5</sub> | -          | -       | -            | 3.1       | -          |

**Table S5.** <sup>3</sup>J<sub>H-H</sub> coupling constants (Hz) of the sugar units of pentasaccharide (2) in the unbound state.

| <sup>3</sup> J <sub>H-H</sub> | GlcNS6S(E) | GlcA(D) | GlcNS3S6S(C) | IdoA(B) | GlcNS6S(A) |
|-------------------------------|------------|---------|--------------|---------|------------|
| <sup>3</sup> J <sub>1-2</sub> | 3.7        | 7.9     | 3.5          | -       | 3.5        |
| <sup>3</sup> J <sub>2-3</sub> | 9.9        | 9.3     | 10.6         | -       | 10.6       |
| <sup>3</sup> J <sub>3-4</sub> | -          | -       | -            | -       | -          |
| <sup>3</sup> J <sub>4-5</sub> | -          | -       | -            | 2.5     | -          |

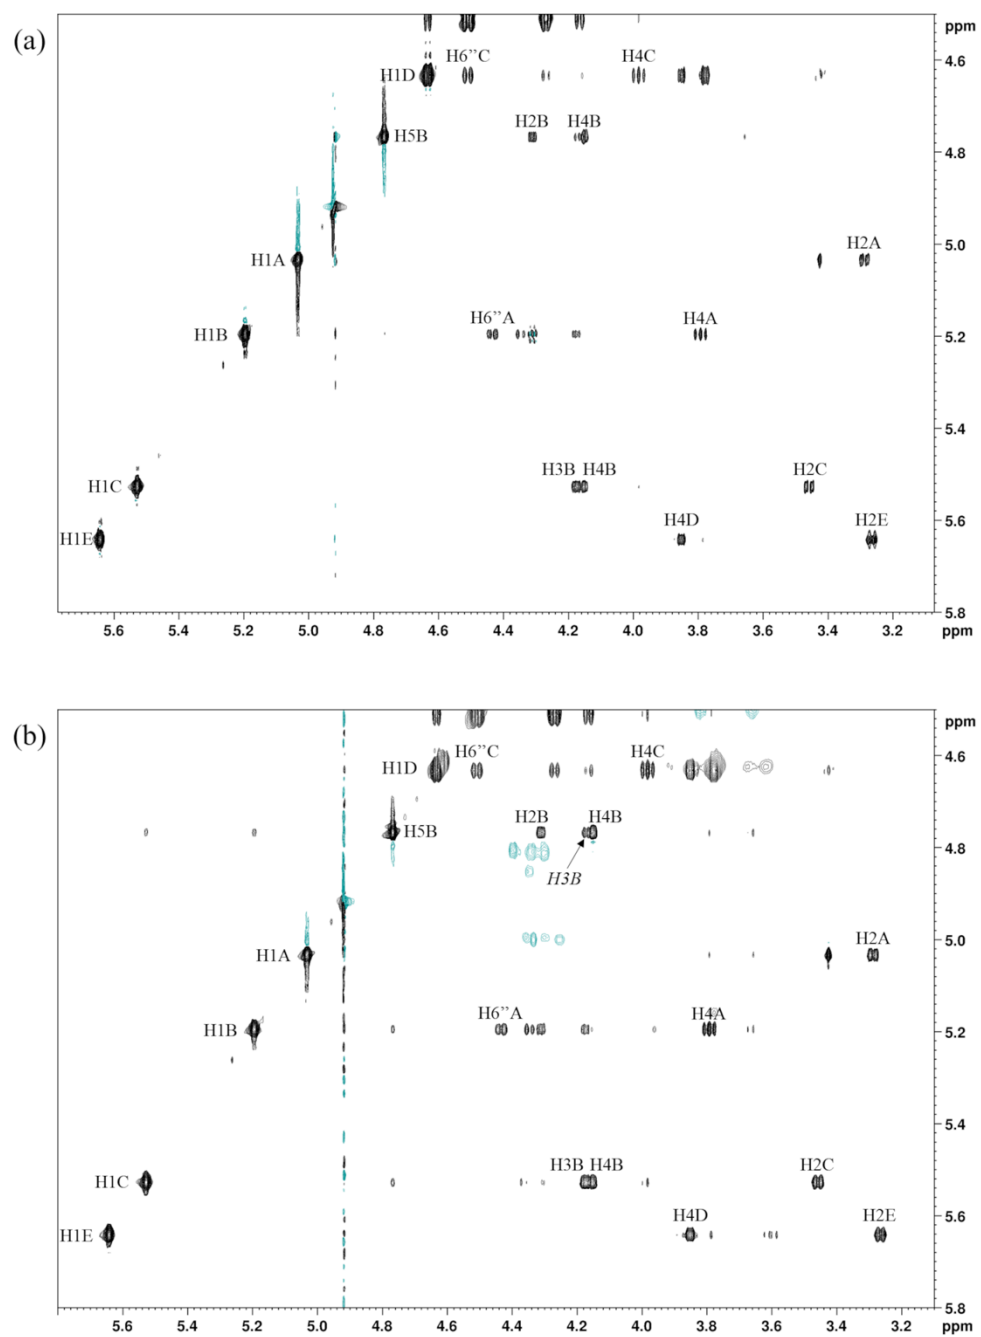

**Figure S5.** NOESY spectrum of pentasaccharide (1) [panel (a)]. Tr-NOESY spectrum of pentasaccharide (1) interacting with AT [panel (b)].



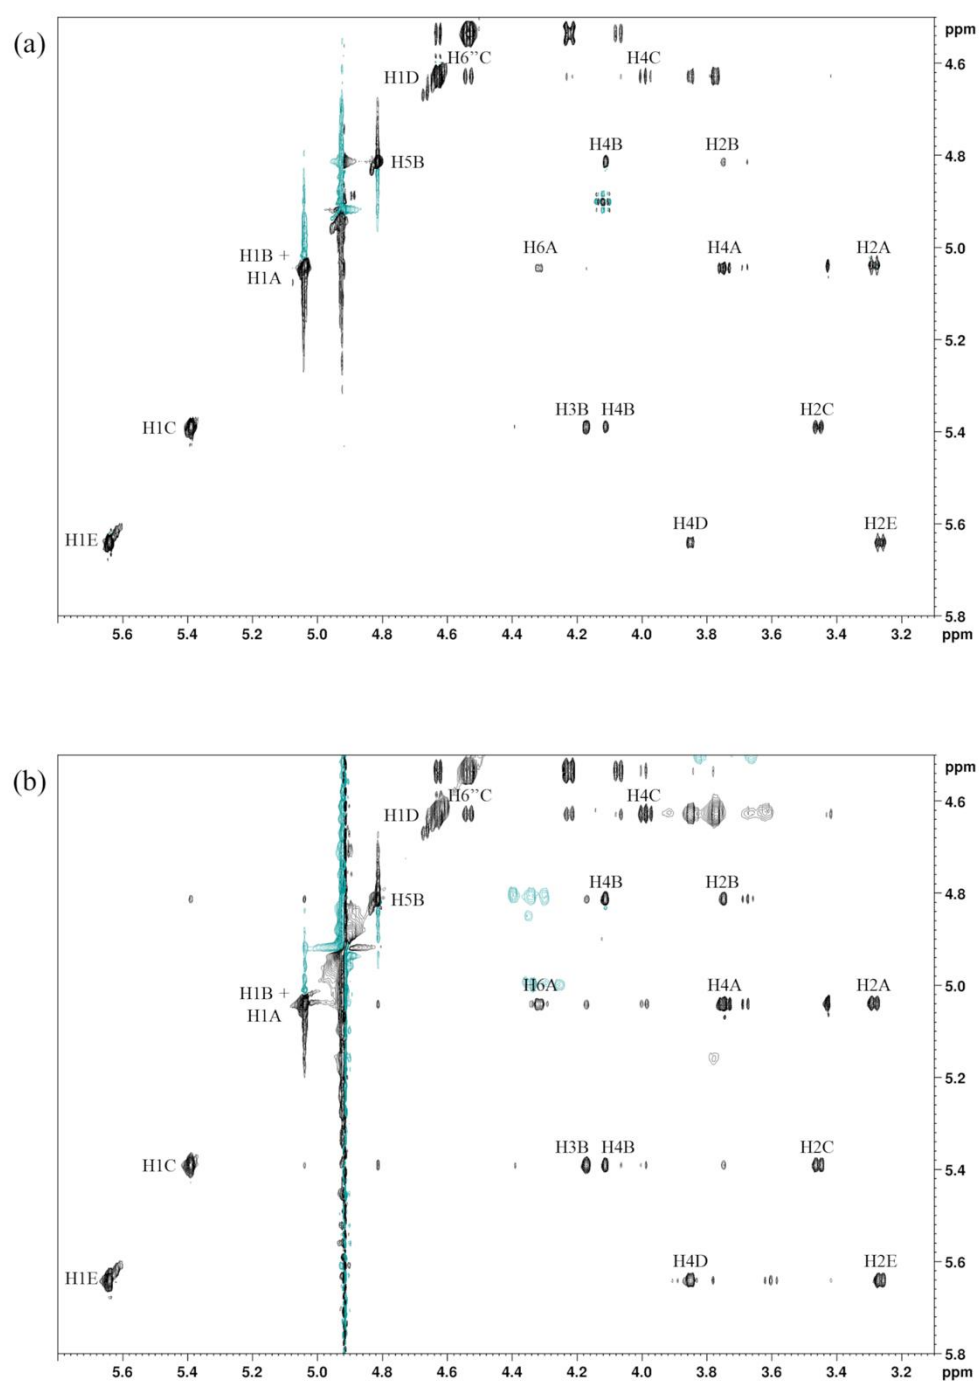

**Figure S6.** NOESY spectrum of pentasaccharide (2) [panel (a)]. Tr-NOESY spectrum of pentasaccharide (2) interacting with AT [panel (b)].

**Table S6.** H1-H2 NOEs and tr-NOEs of GlcNS6S(E, C, A) of pentasaccharide (1) in the unbound and AT-bound states. The mixing time ( $T_{\text{mix}}$ ) is reported in seconds. The NOE and tr-NOE intensities are in percentage.

| $T_{\text{mix}}$ | <i>GlcNS6S(E)</i> |        | <i>GlcNS3S6S(C)</i> |        | <i>GlcNS6S(A)</i> |        |
|------------------|-------------------|--------|---------------------|--------|-------------------|--------|
|                  | NOE               | tr-NOE | NOE                 | tr-NOE | NOE               | tr-NOE |
|                  | H1-H2             | H1-H2  | H1-H2               | H1-H2  | H1-H2             | H1-H2  |
| 0.15             | 4.1               | 9.4    | 4.4                 | 9.6    | 4.4               | 8.4    |
| 0.3              | 8.7               | 20.6   | 8.6                 | 19.2   | 6.8               | 18.1   |
| 0.5              | 14.3              | 35.2   | 14.0                | 31.3   | 12.1              | 31.6   |

**Table S7.** H1-H2 NOEs and tr-NOEs of GlcNS6S(E, C, A) of pentasaccharide (2) in the unbound and AT-bound states. The mixing time ( $T_{\text{mix}}$ ) is reported in seconds. The NOE and tr-NOE intensities are in percentage.

| $T_{\text{mix}}$ | <i>GlcNS6S(E)</i> |        | <i>GlcNS3S6S(C)</i> |        | <i>GlcNS6S(A)</i> |        |
|------------------|-------------------|--------|---------------------|--------|-------------------|--------|
|                  | NOE               | tr-NOE | NOE                 | tr-NOE | NOE               | tr-NOE |
|                  | H1-H2             | H1-H2  | H1-H2               | H1-H2  | H1-H2             | H1-H2  |
| 0.15             | 4.1               | 9.4    | 5.3                 | 8.8    | 4.2               | 8.4    |
| 0.3              | 8.7               | 20.2   | 8.0                 | 17.8   | 7.3               | 18.2   |
| 0.5              | 14.3              | 34.9   | 13.1                | 27.4   | 11.6              | 33.1   |

**Table S8.** H5-H2 and H5-H4 NOEs and tr-NOEs of IdoA(B) of pentasaccharide (2) in the unbound and AT-bound states. The mixing time ( $T_{\text{mix}}$ ) is reported in seconds. The NOE and tr-NOE intensities are in percentage. The ratio H5-H2/H5-H4 is shown in brackets.

| $T_{\text{mix}}$ | <i>IdoA(B)</i>  |                 |
|------------------|-----------------|-----------------|
|                  | NOE             | tr-NOE          |
|                  | H5-H2/<br>H5-H4 | H5-H2/<br>H5-H4 |
| 0.15             | 0.8/3.2 (0.3)   | 5.1/7.1 (0.7)   |
| 0.3              | 1.7/6.5 (0.3)   | 10.5/15.4 (0.7) |
| 0.5              | 3.2/11.0 (0.3)  | 16.9/25.9 (0.7) |

**Table S9.** H1-H6 and H1-H4 interglycosidic NOEs and tr-NOEs characterizing the backbone conformation of pentasaccharide (1) in the unbound and AT-bound states. The mixing time ( $T_{\text{mix}}$ ) is reported in seconds. The NOE and tr-NOE intensities are in percentage. The ratios H1-H6/H1-H4 are shown in brackets.

| $T_{\text{mix}}$ | <i>GlcNS6S(E)-GlcA(D)</i> |        | <i>GlcA(D)-<br/>GlcNS3S6S(C)</i> |                   | <i>IdoA2S(B)-<br/>GlcNS6S(A)</i> |                 |
|------------------|---------------------------|--------|----------------------------------|-------------------|----------------------------------|-----------------|
|                  | NOE                       | tr-NOE | NOE                              | tr-NOE            | NOE                              | tr-NOE          |
|                  | H1-H4                     | H1-H4  | H1-H6''/<br>H1-H4                | H1-H6''/<br>H1-H4 | H1-H6/<br>H1-H4                  | H1-H6/<br>H1-H4 |
| 0.15             | 3.0                       | 8.2    | 4.6/2.9 (1.6)                    | 9.4/8.5 (1.1)     | 2.3/3.1 (0.7)                    | 5.1/10.2 (0.5)  |
| 0.3              | 6.3                       | 18.2   | 7.5/5.5 (1.4)                    | 12.6/19.4 (0.6)   | 4.3/6.3 (0.7)                    | 9.6/18.2 (0.5)  |
| 0.5              | 10.8                      | 30.9   | 9.9/8.6 (1.2)                    | 14.8/28.4 (0.5)   | 6.5/10.2 (0.6)                   | 15.5/27.8 (0.6) |

**Table S10.** H1-H6 (or H1-H3) and H1-H4 interglycosidic NOEs and tr-NOEs characterizing the backbone conformation of pentasaccharide (2) in the unbound and AT-bound states. The mixing time ( $T_{\text{mix}}$ ) is reported in seconds. The NOE and tr-NOE intensities are in percentage. The ratios H1-H6/H1-H4 and H1-H3/H1-H4 are shown in brackets.

| $T_{\text{mix}}$ | <i>GlcNS6S(E)-GlcA(D)</i> |        | <i>GlcA(D)-GlcNS3S6S(C)</i> |                    | <i>GlcNS3S6S(C)-IdoA(B)</i> |                    | <i>IdoA(B)-GlcNS6S(A)</i> |                    |
|------------------|---------------------------|--------|-----------------------------|--------------------|-----------------------------|--------------------|---------------------------|--------------------|
|                  | NOE                       | tr-NOE | NOE                         | tr-NOE             | NOE                         | tr-NOE             | NOE                       | tr-NOE             |
|                  | H1-H4                     | H1-H4  | H1-H6''/<br>H1-H4           | H1-H6''/<br>H1-H4  | H1-H3/<br>H1-H4             | H1-H3/<br>H1-H4    | H1-H6/<br>H1-H4           | H1-H6/<br>H1-H4    |
| 0.15             | 3.1                       | 8.6    | 4.1/2.8<br>(1.4)            | 9.1/8.1<br>(1.1)   | 5.1/2.4<br>(2.2)            | 10.8/5.2<br>(2.1)  | 1.8/5.2<br>(0.3)          | 4.5/13.1<br>(0.3)  |
| 0.3              | 6.4                       | 18.7   | 7.3/5.4<br>(1.3)            | 11.8/18.4<br>(0.6) | 10.1/4.9<br>(2.1)           | 20.7/10.5<br>(2.0) | 3.6/10.5<br>(0.3)         | 11.5/27.5<br>(0.4) |
| 0.5              | 10.9                      | 33.0   | 8.9/8.1<br>(1.1)            | 14.5/25.8<br>(0.6) | 16.5/8.2<br>(2.0)           | 32.7/17.7<br>(1.8) | 6.1/17.8<br>(0.3)         | 20.8/45.4<br>(0.5) |

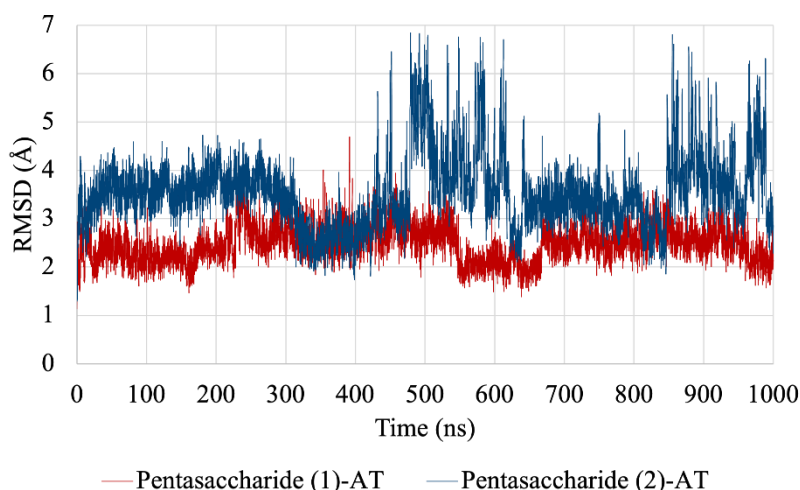

**Figure S7.** RMSD analysis of pentasaccharides (1) and (2) in complex with AT. The red and blue lines show the RMSD calculated for pentasaccharides (1) and (2) in the AT-bound state during the equilibration and production stages of MD simulations. All distances are expressed in Ångström (Å).

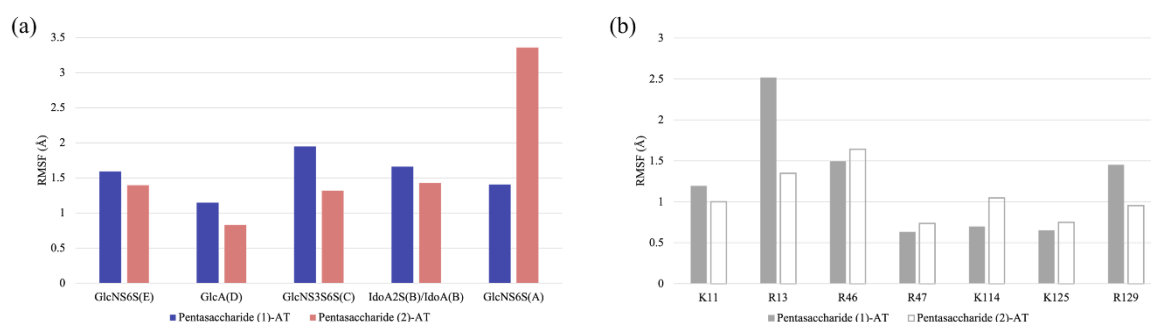

**Figure S8.** RMSF analysis of the ligand units and key protein residues in the pentasaccharide (1)-AT and pentasaccharide (2)-AT complexes. Panel (a): RMSFs are defined for each ligand units of both pentasaccharides (1) and (2) in the AT-bound state during the last 500 ns MD simulations. Panel (b): RMSFs are delineated for the protein residues in the AT binding site of the pentasaccharide (1)-AT and pentasaccharide (2)-AT complexes during the last 500 ns MD simulations. All distances are expressed in Ångström (Å).

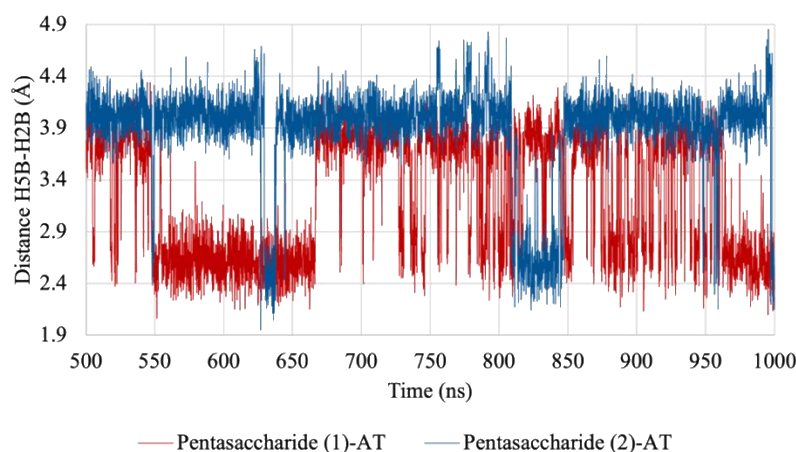

**Figure S9.** Conformation of IdoA2S(B) and IdoA(B). Plot of the H5B-H2B distance (Å) in the pentasaccharide (1)-AT and pentasaccharide (2)-AT complexes during the last 500 ns MD simulations.

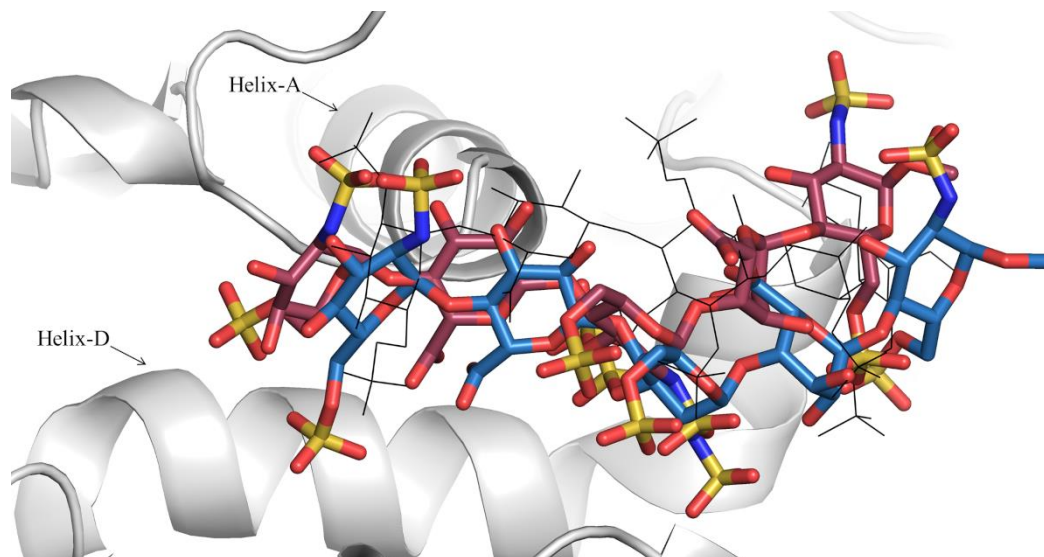

**Figure S10.** Structures of pentasaccharides (1) and (2) in the AT-bound state selected from the MD trajectories considering the most populated states for each dihedral angle. Pentasaccharide (1) presents a single geometry for each dihedral angle  $\varphi_i/\psi_i$ , while pentasaccharide (2) exhibits two conformational states for the dihedral angle  $\varphi_4/\psi_4$ . Pentasaccharide (1) is displayed as black lines; pentasaccharide (2) with the dihedral angle  $\varphi_4/\psi_4$  of  $44^\circ/6^\circ$  is drawn as fuchsia, red, blue and yellow tubes corresponding to carbon, oxygen, nitrogen and sulfur atoms; pentasaccharide (2) with the dihedral angle  $\varphi_4/\psi_4$  of  $-37^\circ/-28^\circ$  is reported as light blue, red, blue and yellow tubes indicating carbon, oxygen, nitrogen and sulfur atoms; AT is shown as gray ribbon.

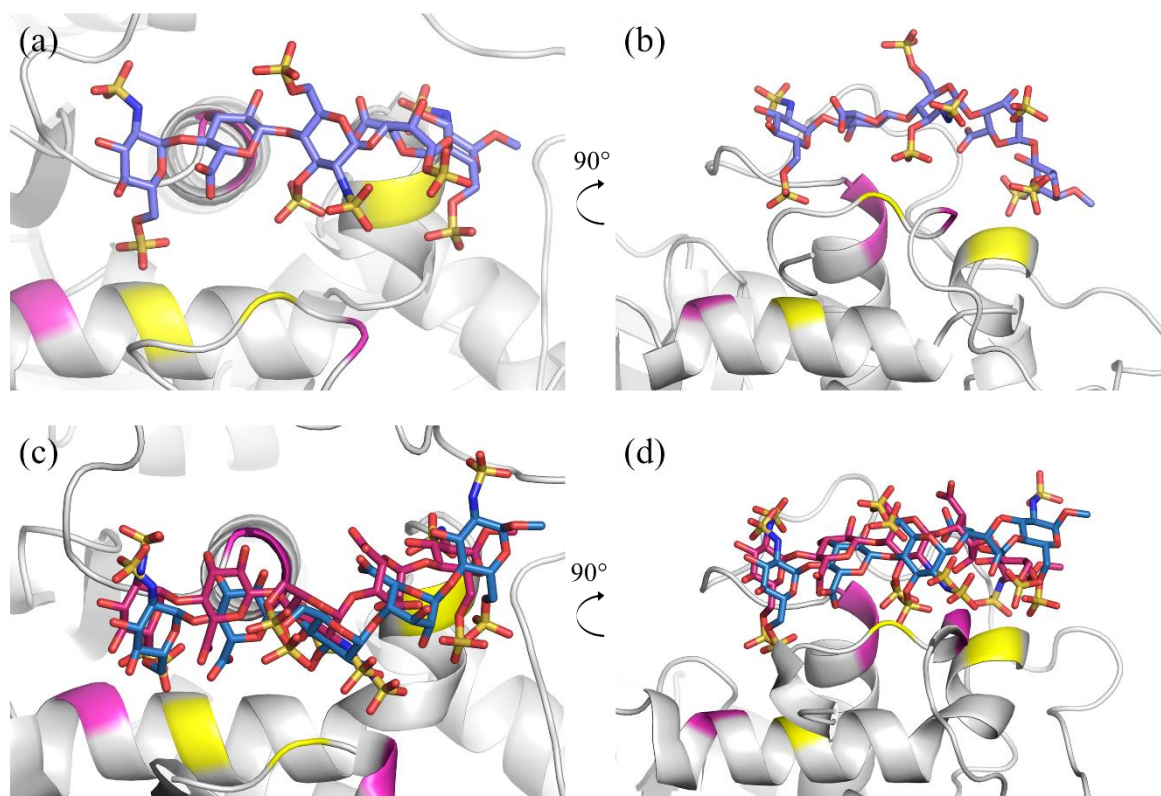

**Figure S11.** Conformers of pentasaccharides (1) and (2) in the AT-bound state obtained by clustering analysis. For pentasaccharide (1), a single cluster was found [panels (a) and (b)], while for pentasaccharide (2), two dominant clusters were collected [panels (c) and (d)]. Pentasaccharide (1) is displayed as purple, red, blue and yellow tubes corresponding to carbon, oxygen, nitrogen and sulfur atoms; pentasaccharide (2) is drawn as light blue (conformer 1 in Table S11) or fuchsia (conformer 2 in Table S11), red, blue and yellow tubes indicating carbon, oxygen, nitrogen and sulfur atoms; AT is shown as gray ribbon.

**Table S11.** Dihedral angles ( $\varphi_i/\psi_i$ ) of the clustered conformers of pentasaccharides (1) and (2) in the AT-bound state.

| System                 | Conformer | $\varphi_1/\psi_1$ | $\varphi_2/\psi_2$ | $\varphi_3/\psi_3$ | $\varphi_4/\psi_4$ |
|------------------------|-----------|--------------------|--------------------|--------------------|--------------------|
| Pentasaccharide (1)-AT | 1 (93%)   | -46°/-35°          | 43°/-3°            | -67°/-44°          | 56°/12°            |
| Pentasaccharide (2)-AT | 1 (33%)   | -27°/-29°          | 39°/10°            | -57°/-44°          | 36°/10°            |
| Pentasaccharide (2)-AT | 2 (8%)    | -36°/-37°          | 51°/17°            | -17°/-35°          | -36°/-24°          |

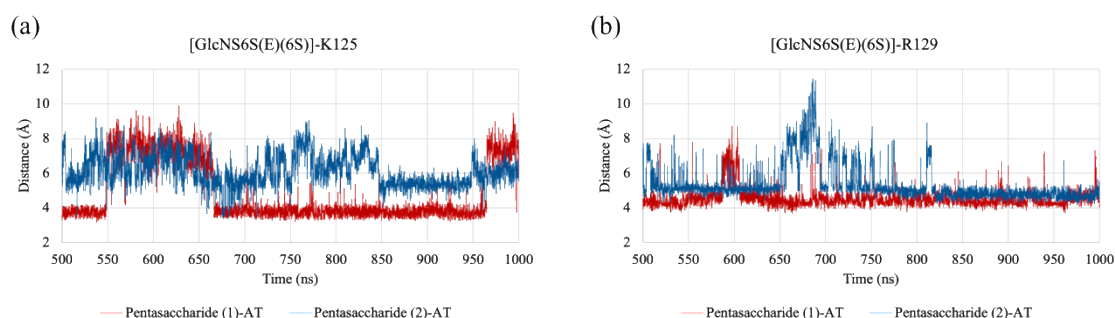

**Figure S12.** (a) Distances of GlcNS6S(E)(6S) to K125 versus MD simulation time in the pentasaccharide (1)-AT (red line) and pentasaccharide (2)-AT (blue line) complexes. (b) Distances of

GlcNS6S(E)(6S) to R129 versus MD simulation time in the pentasaccharide (1)-AT (red line) and pentasaccharide (2)-AT (blue line) complexes. Distances are in angstrom ( $\text{\AA}$ ), time is in nanoseconds (ns)

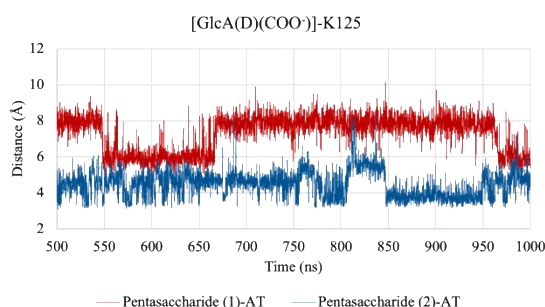

**Figure S13.** Distance between the carboxyl group of GlcA(D) and the  $\text{NH}_3^+$  group of K125 versus MD simulation time in the pentasaccharide (1)-AT (red line) and pentasaccharide (2)-AT (blue line) complexes. Distances are in angstrom ( $\text{\AA}$ ), time is in nanoseconds (ns).

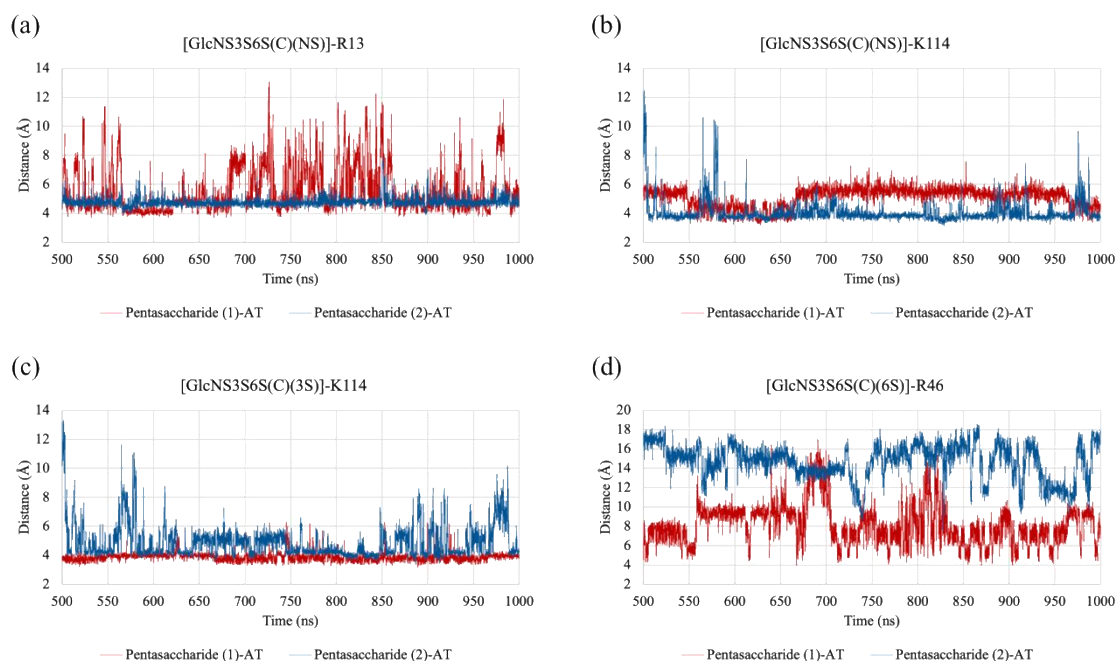

**Figure S14.** Distances of GlcNS3S6S(C)(NS) to R13 (a panel) and K114 (b panel), GlcNS3S6S(C)(3S) to K114 (c panel), GlcNS3S6S(C)(6S) to R46 (d panel) versus MD simulation time in the pentasaccharide (1)-AT (red line) and pentasaccharide (2)-AT (blue line) complexes. Distances are in angstrom ( $\text{\AA}$ ), time is in nanoseconds (ns).



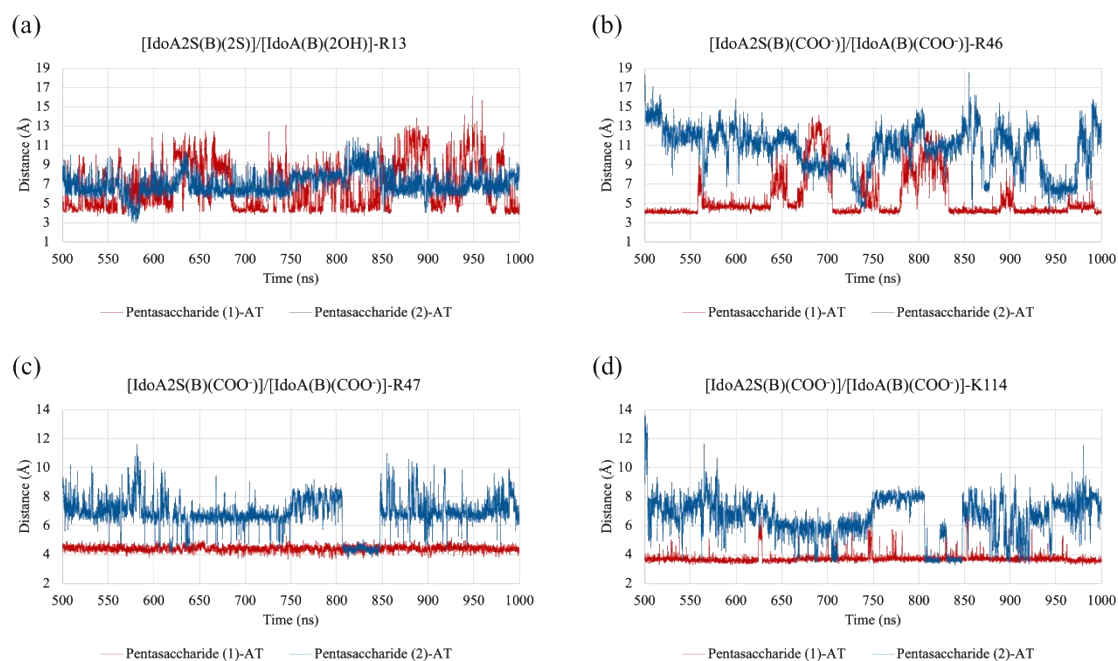

**Figure S15.** Distances of IdoA2S(2S)/IdoA(B)(2OH) to R13 (a panel), IdoA2S/IdoA(B)(COO<sup>-</sup>) to R46 (b panel), R47 (c panel) and K114 (d panel) versus MD simulation time in the pentasaccharide (1)-AT (red line) and pentasaccharide (2)-AT (blue line) complexes. Distances are in angstrom (Å), time is in nanoseconds (ns).

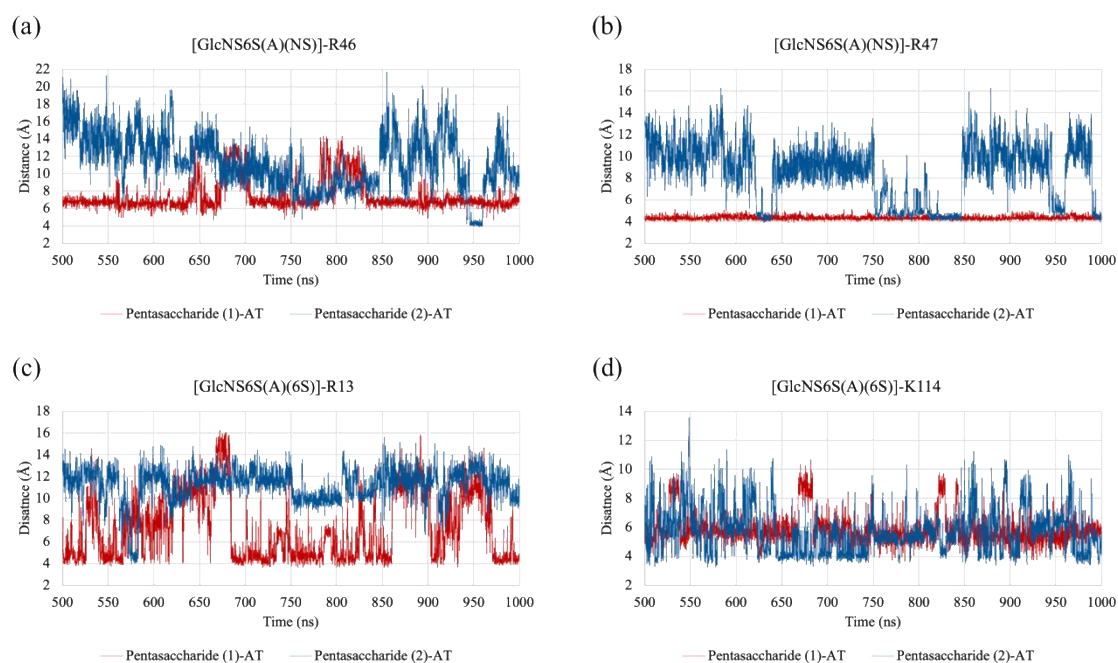

**Figure S16.** Distances of GlcNS6S(A)(NS) to R46 (a panel) and R47 (b panel), GlcNS6S(A)(6S) to R13 (c panel) and K114 (d panel) versus MD simulation time in the pentasaccharide (1)-AT (red line) and pentasaccharide (2)-AT (blue line) complexes. Distances are in angstrom (Å), time is in nanoseconds (ns).

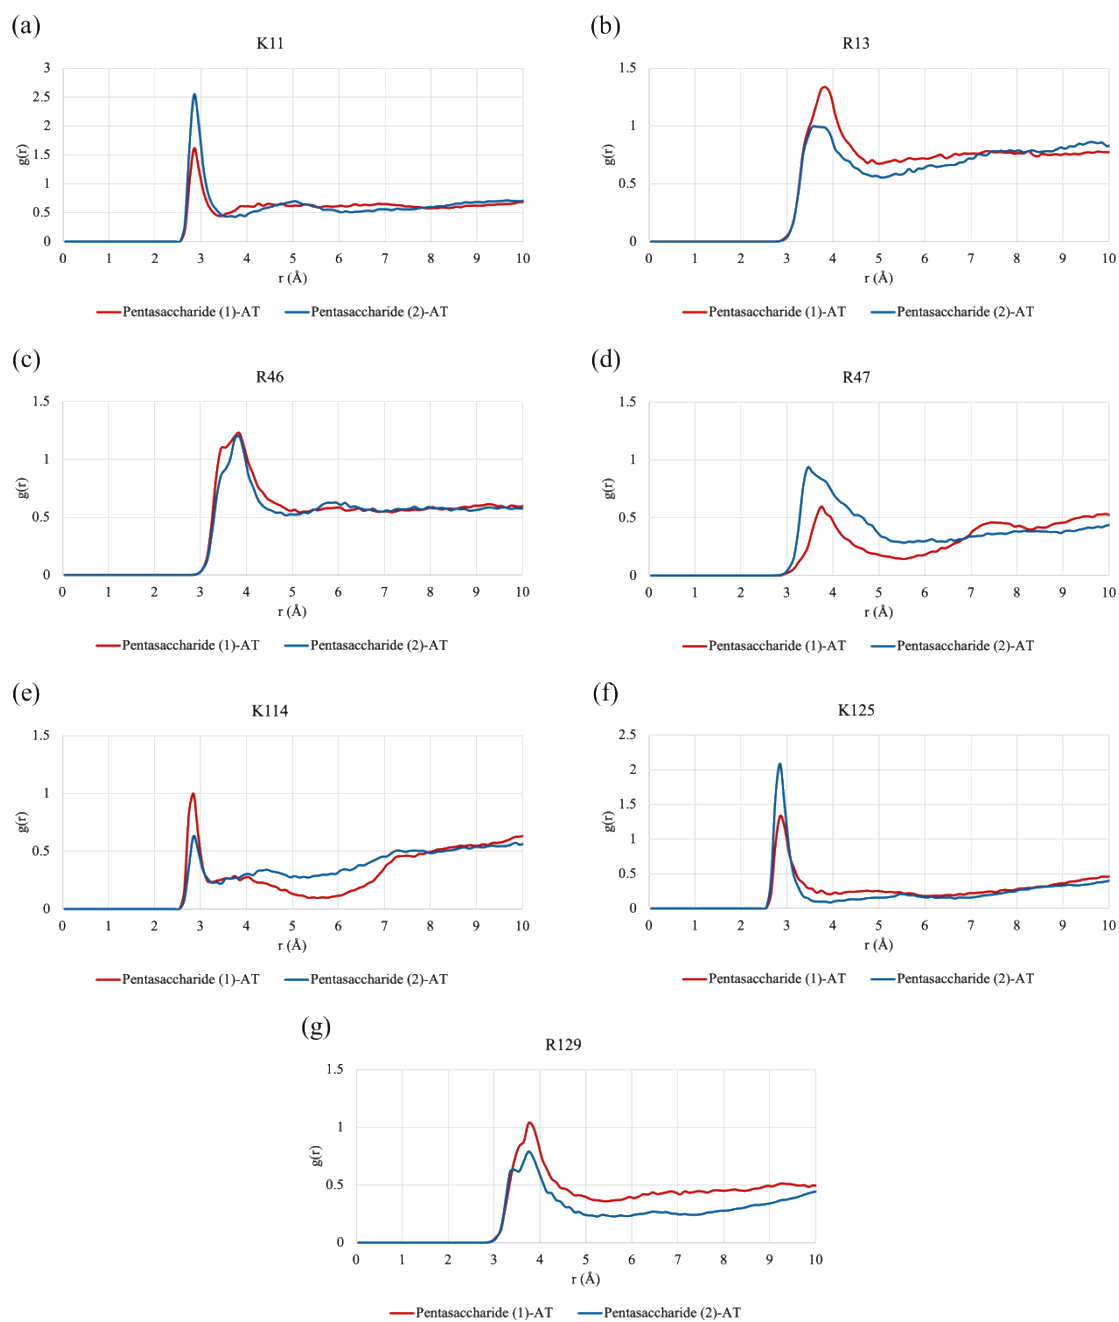

**Figure S17.** Radial distribution function  $[g(r)]$  curves between selected protein residues: K11 (panel a), R13 (b panel), R46 (c panel), R47 (d panel), K114 (e panel), K125 (f panel), R129 (g panel) and water molecules in the pentasaccharide (1)-AT (red line) and pentasaccharide (2)-AT (blue line) complexes. Distances are in angstrom (Å).



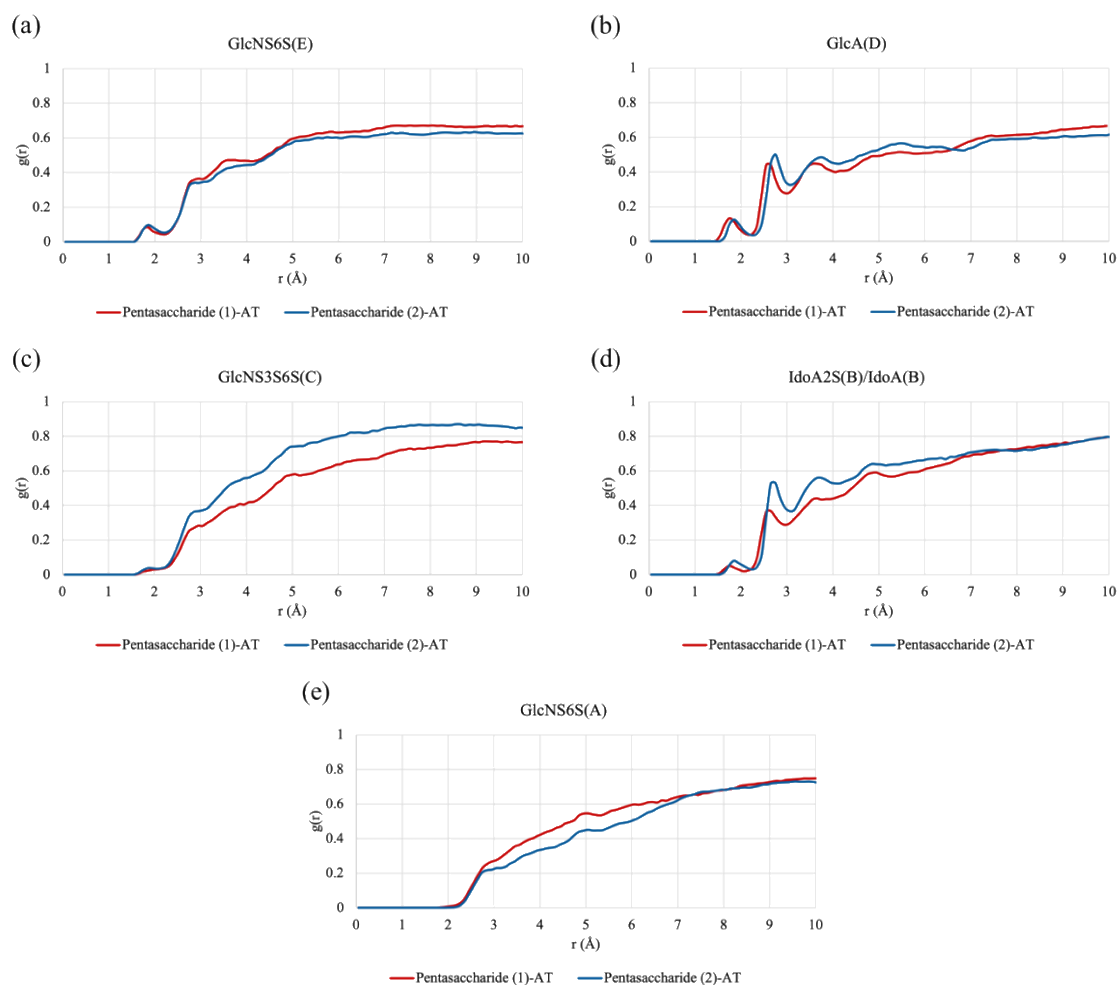

**Figure S18.** Radial distribution function  $[g(r)]$  curves between ligand units: GlcNS6S(E) (a panel), GlcA(D) (b panel), GlcNS3S6S(C) (c panel), IdoA2S(B)/IdoA(B) (d panel), GlcNS6S(A) (e panel) and water molecules in the pentasaccharide (1)-AT (red lines) and pentasaccharide (2)-AT (blue lines) complexes. Distances are in angstrom (Å).

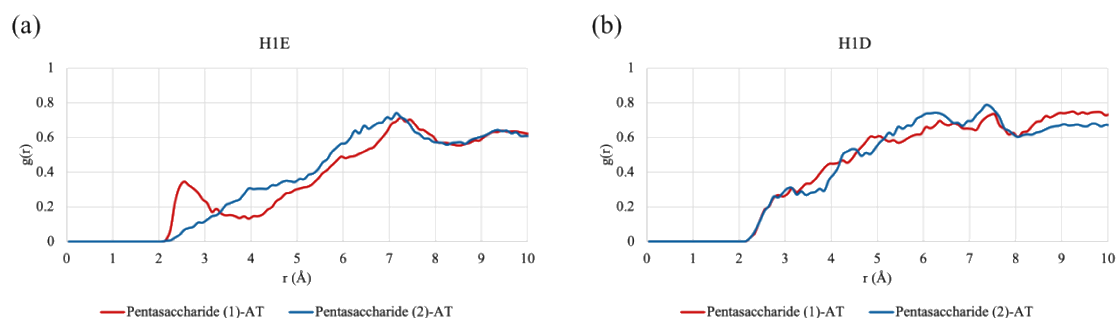

**Figure S19.** Radial distribution function  $[g(r)]$  curves between selected ligand protons: H1 of GlcNS6S(E) (panel a), H1 of GlcA(D) (panel b) and water molecules in the pentasaccharide (1)-AT (red lines) and pentasaccharide (2)-AT (blue lines) complexes. Distances are in angstrom (Å).

**Table S12.** Comparison between the binding epitopes obtained experimentally (Exp STD) and calculated during MD simulation (Sim STD) of pentasaccharide (1) in complex with AT. The R-factor is < 0.3. The last column reports the average of the simulated STD values (Ave Sim STD).

|                      |            | 500-<br>550<br>ns | 550-<br>600<br>ns | 600-<br>650<br>ns | 650-<br>700<br>ns | 700-<br>750<br>ns | 750-<br>800<br>ns | 800-<br>850<br>ns | 850-<br>900<br>ns | 900-<br>950<br>ns | 950-<br>1000<br>ns | Ave<br>Sim<br>STD |
|----------------------|------------|-------------------|-------------------|-------------------|-------------------|-------------------|-------------------|-------------------|-------------------|-------------------|--------------------|-------------------|
| Proton               | Exp<br>STD | Sim<br>STD         |                   |
| H1E                  | 70         | 100               | 96                | 97                | 96                | 98                | 97                | 100               | 100               | 100               | 100                | 98                |
| H2E                  | 78         | 87                | 85                | 87                | 87                | 86                | 90                | 91                | 88                | 88                | 86                 | 88                |
| H5E                  | 69         | 100               | 100               | 100               | 100               | 100               | 100               | 100               | 98                | 99                | 98                 | 99                |
| H1D                  | 72         | 55                | 56                | 55                | 54                | 55                | 62                | 58                | 56                | 57                | 62                 | 57                |
| H1C                  | 70         | 80                | 76                | 73                | 75                | 76                | 81                | 73                | 74                | 77                | 80                 | 76                |
| H2C                  | 100        | 87                | 81                | 84                | 84                | 83                | 89                | 86                | 86                | 92                | 87                 | 86                |
| H6'C                 | 82         | 81                | 78                | 80                | 79                | 76                | 84                | 83                | 86                | 83                | 89                 | 82                |
| H6''C                | 82         | 88                | 89                | 88                | 88                | 86                | 90                | 90                | 89                | 89                | 89                 | 89                |
| H1B                  | 64         | 87                | 92                | 89                | 94                | 89                | 91                | 88                | 86                | 87                | 82                 | 89                |
| H2B                  | 81         | 89                | 93                | 90                | 94                | 89                | 92                | 88                | 87                | 87                | 85                 | 89                |
| H1A                  | 66         | 62                | 65                | 63                | 64                | 62                | 64                | 65                | 68                | 69                | 68                 | 65                |
| H2A                  | 95         | 79                | 75                | 73                | 75                | 75                | 73                | 76                | 80                | 79                | 82                 | 77                |
| H3A                  | 88         | 73                | 72                | 71                | 71                | 67                | 68                | 70                | 72                | 72                | 74                 | 71                |
| OCH <sub>3</sub> (A) | 82         | 55                | 56                | 57                | 55                | 54                | 57                | 55                | 55                | 54                | 62                 | 56                |
| OCH <sub>3</sub> (A) | 82         | 52                | 54                | 55                | 53                | 50                | 53                | 54                | 53                | 54                | 59                 | 54                |
| OCH <sub>3</sub> (A) | 82         | 50                | 52                | 54                | 51                | 49                | 52                | 51                | 51                | 51                | 61                 | 52                |

**Table S13.** Comparison between the binding epitopes obtained experimentally (Exp STD) and calculated during MD simulation (Sim STD) of pentasaccharide (2) in complex with AT. The R-factor is < 0.3. The last column reports the average of the simulated STD values (Ave Sim STD).

|                      |            | 500-<br>550<br>ns | 550-<br>600<br>ns | 600-<br>650<br>ns | 650-<br>700<br>ns | 700-<br>750<br>ns | 750-<br>800<br>ns | 800-<br>850<br>ns | 850-<br>900<br>ns | 900-<br>950<br>ns | 950-<br>1000<br>ns |                   |
|----------------------|------------|-------------------|-------------------|-------------------|-------------------|-------------------|-------------------|-------------------|-------------------|-------------------|--------------------|-------------------|
| Proton               | Exp<br>STD | Sim<br>STD         | Ave<br>Sim<br>STD |
| H1E                  | 76         | 100               | 100               | 96                | 100               | 100               | 100               | 100               | 100               | 100               | 100                | 97                |
| H2E                  | 81         | 93                | 94                | 100               | 94                | 97                | 99                | 95                | 97                | 98                | 98                 | 95                |
| H5E                  | 73         | 85                | 90                | 89                | 88                | 91                | 86                | 87                | 87                | 88                | 92                 | 87                |
| H1D                  | 72         | 47                | 49                | 47                | 48                | 53                | 49                | 48                | 46                | 47                | 47                 | 50                |
| H1C                  | 65         | 91                | 97                | 99                | 92                | 96                | 94                | 94                | 90                | 91                | 96                 | 92                |
| H2C                  | 93         | 62                | 63                | 65                | 63                | 61                | 60                | 57                | 58                | 57                | 61                 | 64                |
| H6'C                 | 66         | 52                | 53                | 55                | 53                | 53                | 51                | 52                | 50                | 51                | 51                 | 53                |
| H6''C                | 66         | 54                | 55                | 61                | 54                | 52                | 54                | 49                | 50                | 48                | 53                 | 54                |
| H4B                  | 55         | 45                | 45                | 43                | 42                | 45                | 45                | 42                | 41                | 40                | 42                 | 44                |
| H2A                  | 100        | 71                | 76                | 76                | 75                | 76                | 75                | 72                | 69                | 71                | 73                 | 76                |
| OCH <sub>3</sub> (A) | 59         | 68                | 72                | 74                | 71                | 72                | 74                | 71                | 68                | 68                | 70                 | 70                |
| OCH <sub>3</sub> (A) | 59         | 62                | 65                | 69                | 67                | 67                | 66                | 62                | 63                | 63                | 66                 | 65                |
| OCH <sub>3</sub> (A) | 59         | 58                | 65                | 63                | 64                | 64                | 63                | 64                | 60                | 61                | 62                 | 62                |

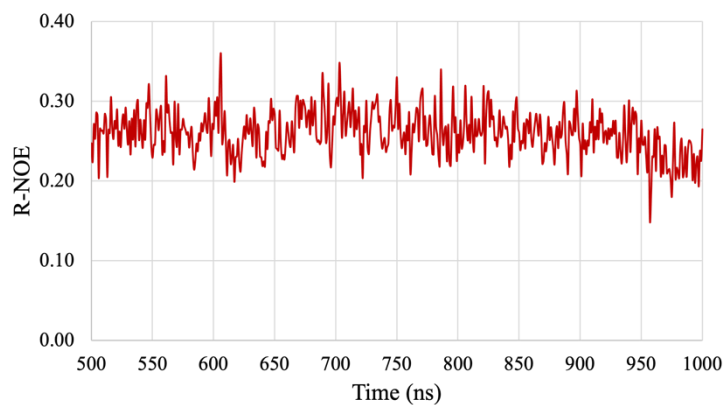

**Figure S20.** Evolution of the R-factor (R-NOE) of pentasaccharide (1) over the last 500 ns of MD simulation.

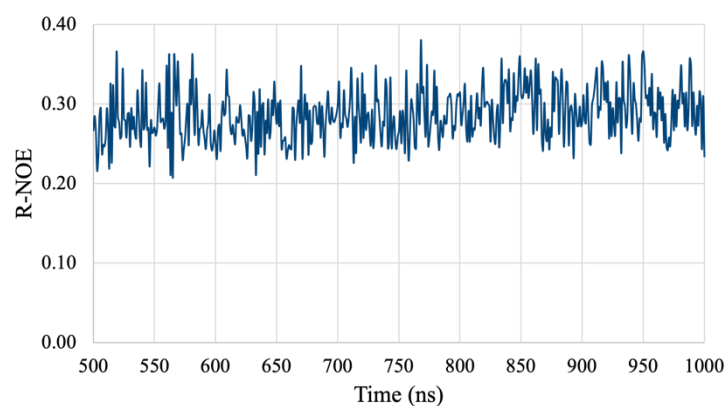

**Figure S21.** Evolution of the R-factor (R-NOE) of pentasaccharide (2) over the last 500 ns of MD simulation.

**Table S14.**  $^1\text{H}/^{13}\text{C}$  chemical shift assignment of pentasaccharide (1).

| Proton           | GlcNS6S(E)         | GlcA(D)    | GlcNS6S(C)         | IdoA2S(B)  | GlcNS6S(A)         |
|------------------|--------------------|------------|--------------------|------------|--------------------|
| 1                | 5.64/100.2         | 4.63/103.8 | 5.53/98.8          | 5.20/102.2 | 5.03/101.0         |
| 2                | 3.26/60.7          | 3.43/75.4  | 3.46/59.3          | 4.31/79.7  | 3.29/60.5          |
| 3                | 3.61/73.8          | 3.85/78.8  | 4.37/78.9          | 4.18/72.6  | 3.66/72.5          |
| 4                | 3.59/71.7          | 3.85/79.5  | 3.98/75.6          | 4.15/78.6  | 3.85/79.5          |
| 5                | 3.90/72.4          | 3.79/78.8  | 4.16/72.3          | 4.77/72.8  | 3.97/71.3          |
| 6                | 4.35-4.43/<br>69.4 | -          | 4.27-4.51/<br>68.7 | -          | 4.16-4.38/<br>69.0 |
| OCH <sub>3</sub> | -                  | -          | -                  | -          | 3.43/58.1          |

**Table S15.**  $^1\text{H}/^{13}\text{C}$  chemical shift assignment of pentasaccharide (2).

| Proton           | GlcNS6S(E)         | GlcA(D)    | GlcNS6S(C)         | IdoA(B)    | GlcNS6S(A) |
|------------------|--------------------|------------|--------------------|------------|------------|
| 1                | 5.64/100.3         | 4.63/104.0 | 5.39/98.2          | 5.04/104.9 | 5.04/101.1 |
| 2                | 3.26/60.7          | 3.42/75.4  | 3.46/59.3          | 3.75/71.4  | 3.29/60.6  |
| 3                | 3.67/72.7          | 3.85/78.8  | 4.39/78.7          | 4.17/79.5  | 3.67/72.7  |
| 4                | 3.59/71.7          | 3.85/79.5  | 3.99/75.5          | 4.11/77.3  | 3.78/79.8  |
| 5                | 4.00/71.2          | 3.75/81.0  | 4.07/72.2          | 4.81/71.0  | 4.00/71.2  |
| 6                | 4.16-4.38/<br>69.0 | -          | 4.22-4.53/<br>68.5 | -          | 4.32/69.3  |
| OCH <sub>3</sub> | -                  | -          | -                  | -          | 3.45/58.1  |

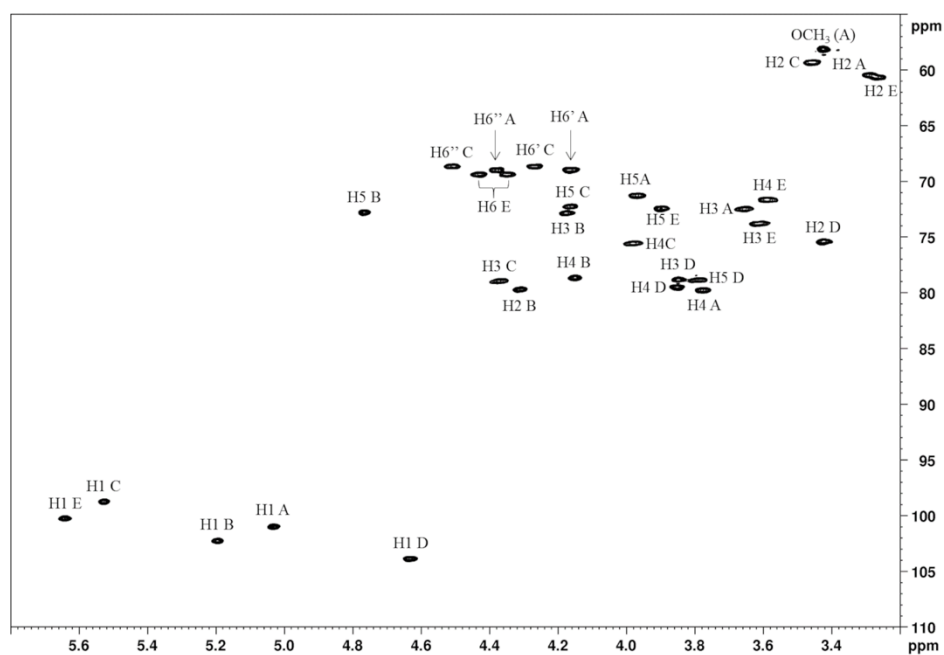

**Figure S22.**  $^1\text{H}$ - $^{13}\text{C}$  HSQC NMR spectrum of pentasaccharide (1).

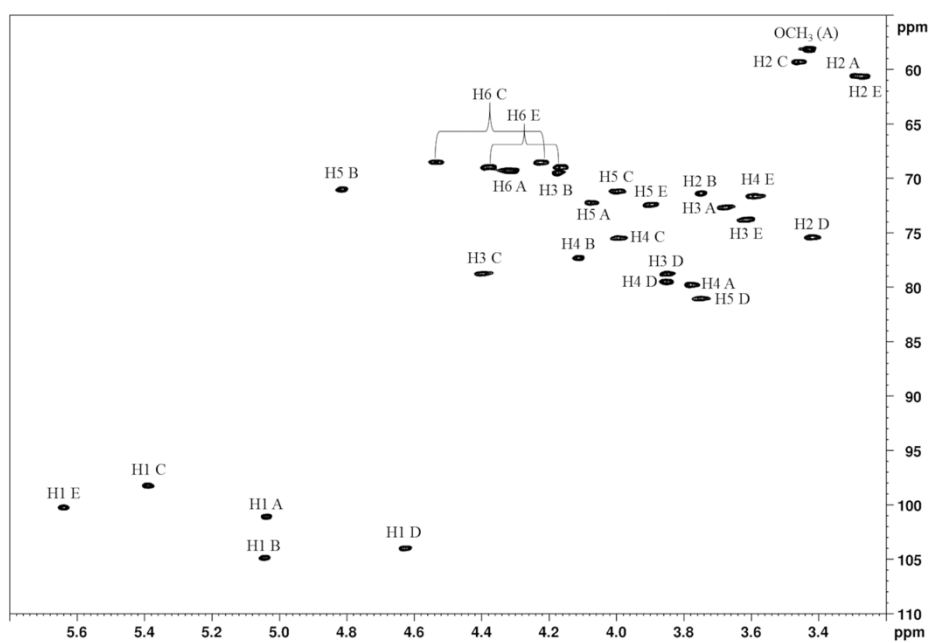

**Figure S23.**  $^1\text{H}$ - $^{13}\text{C}$  HSQC NMR spectrum of pentasaccharide (2).

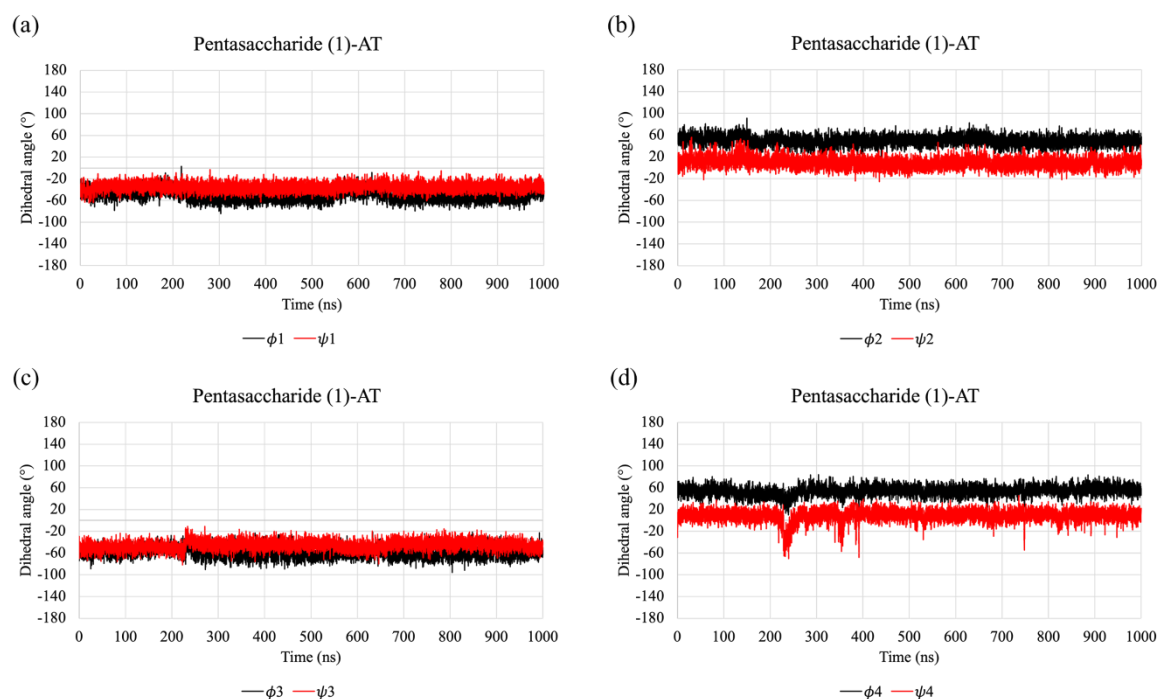

**Figure S24.** Conformations of the  $\phi_i/\psi_i$  dihedral angles of pentasaccharide (1) in complex with AT. The pair of dihedral angles:  $\phi_1/\psi_1$ ,  $\phi_2/\psi_2$ ,  $\phi_3/\psi_3$ , and  $\phi_4/\psi_4$  are reported in panels (a), (b), (c), and (d), respectively. Dihedral angles  $\phi_i$  and  $\psi_i$  are represented in black and red lines, respectively

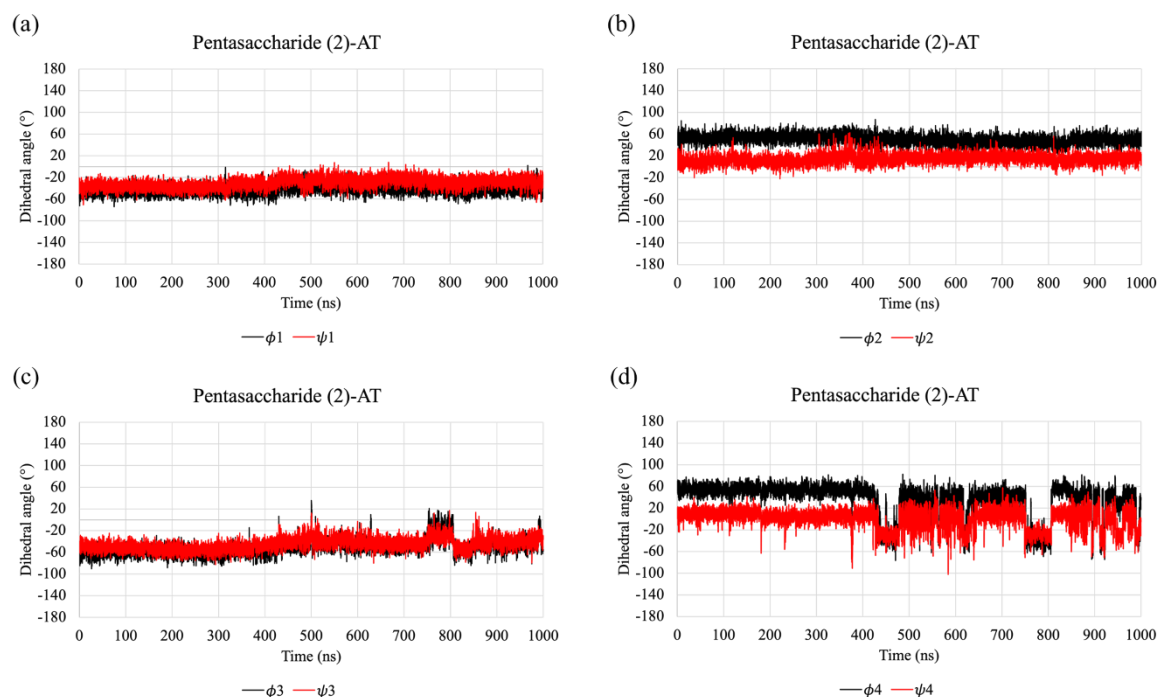

**Figure S25.** Conformations of the  $\phi_i/\psi_i$  dihedral angles of pentasaccharide (2) in complex with AT. The pair of dihedral angles:  $\phi_1/\psi_1$ ,  $\phi_2/\psi_2$ ,  $\phi_3/\psi_3$ , and  $\phi_4/\psi_4$  are reported in panels (a), (b), (c), and (d), respectively. Dihedral angles  $\phi_i$  and  $\psi_i$  are represented in black and red lines, respectively
